# Supplementary material
Source: PubMed Central journal article supplement (PMC3944084)
Supplement: NIHMS486807-supplement-3.pdf [file NIHMS486807-supplement-3.pdf]

A)

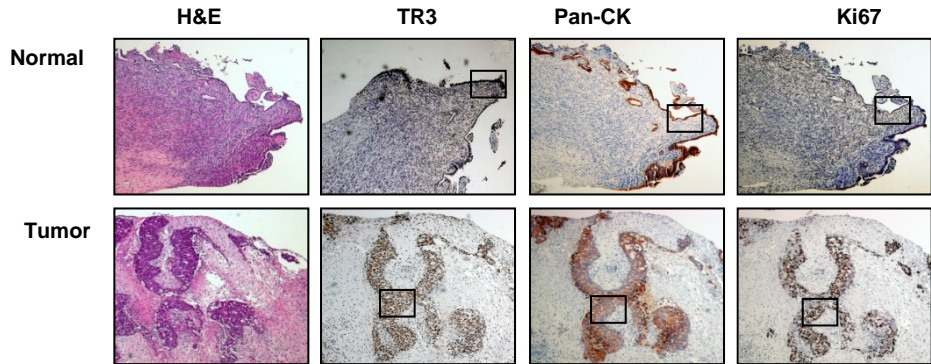

B)

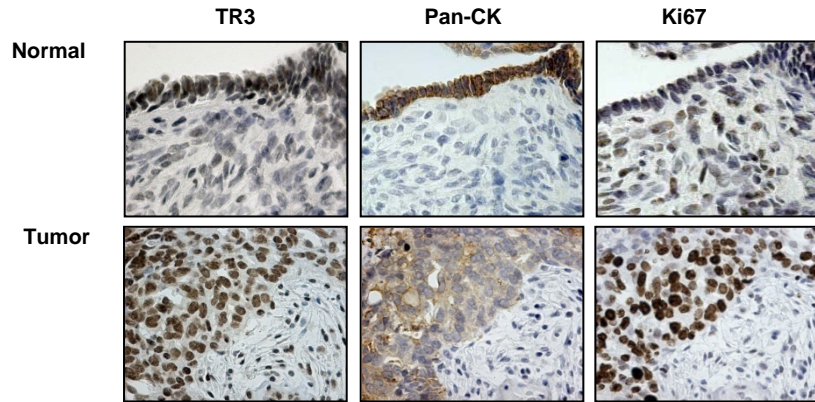

**Supplementary Figure 1. TR3 expression in normal and neoplastic ovarian epithelium. (A)** Representative low power photomicrographs of normal and neoplastic ovarian epithelium from human ovarian cancer patients undergoing surgical resection at Vanderbilt. Immunohistochemical analysis of TR3, the epithelial marker pan-cytokeratin and the proliferation marker Ki67 were performed. **(B)** High power photomicrographs of the boxed areas from (A).

A)

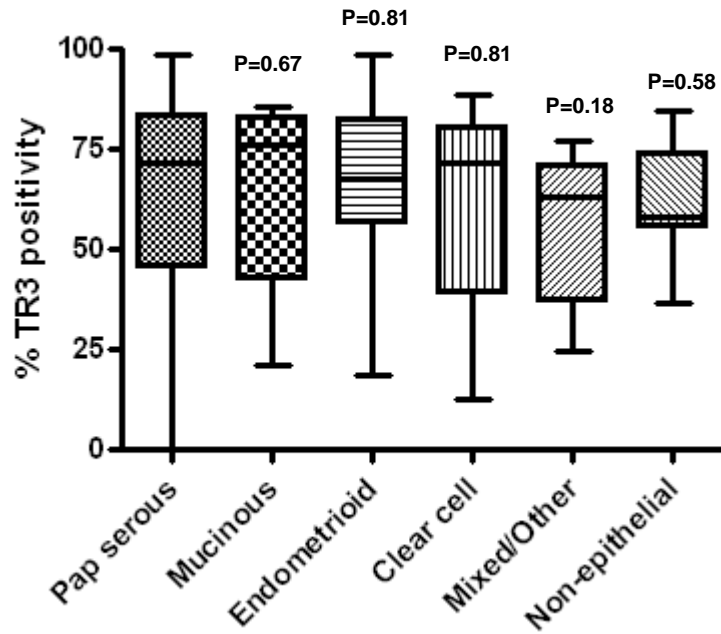

**Supplementary Figure 2.** Compared to epithelial papillary serous tumors, there were no significant differences in TR3 expression in other epithelial-derived tumors or non-epithelial tumors (Mann-Whitney test).

A) Platinum sensitivity-TCGA

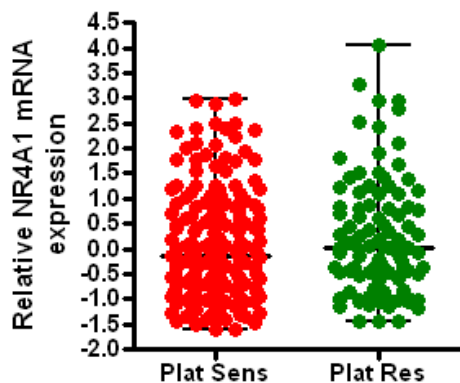

B) Overall survival-TCGA

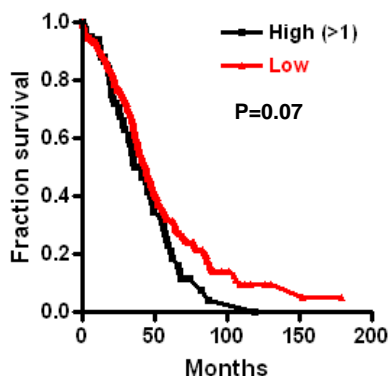

C) PFS

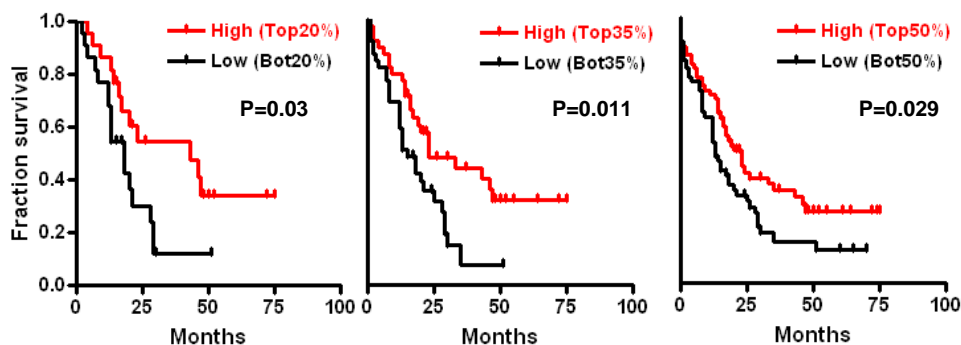

D) OS

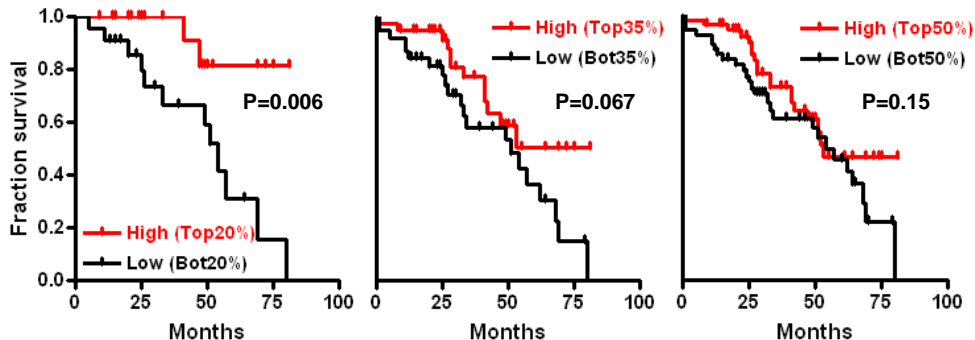

**Supplementary Figure 3. Association of TR3 expression with clinical data in publicly available databases.** TCGA data (ref 29 and data extracted from the TCGA Data Portal (<https://tcga-data.nci.nih.gov/tcga/>) of relative TR3 mRNA expression in tumors from 489 patients. Values shown are standardized Z scores of microarray data from 3 independent platforms. **(A)** Analysis of TR3 expression in platinum sensitive and resistant tumors. **(B)** Overall survival analysis in ovarian cancer patients with high (Z score > 1, representing at least 2-fold increase above expression in normal ovary) and low (Z score < 1) TR3 expression in tumors. P value shown is the likelihood ratio test. Yoshihara et al (ref 29) database of TR3 mRNA expression in serous ovarian tumors collected from 110 patients. Analysis of **(C)** progression-free survival and **(D)** overall survival in patients with top/bottom 20% (22 patients each), top/bottom 35% (39 patients each) and top/bottom 50% (55 patients each) expression of TR3 in tumors. P values shown are likelihood ratio test.

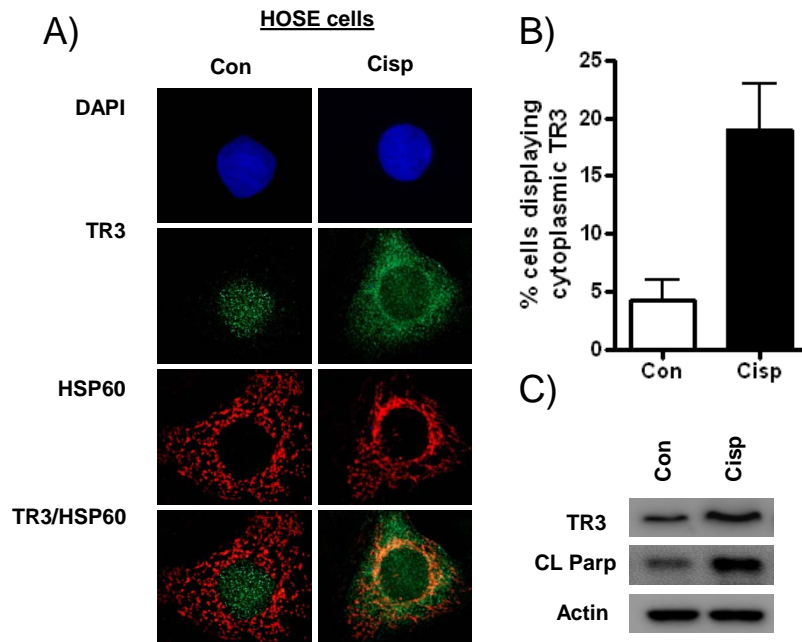

**Supplementary Figure 4. Effects of cisplatin in normal HOSE ovarian epithelial cells. (A)** Immunofluorescence analysis of subcellular TR3 localization in HOSE cells treated with cisplatin (5  $\mu$ M) for 24h. Representative photomicrographs of cells showing cytoplasmic localization of TR3 (green) in relation to DAPI-stained nuclei (blue) and mitochondrial Hsp60 (red) in cisplatin-treated-treated cells. **(B)** Percentage of cells displaying cytoplasmic TR3 targeting in cisplatin-treated cells. **(C)** Effects of cisplatin on protein expression of TR3 and cleaved PARP.

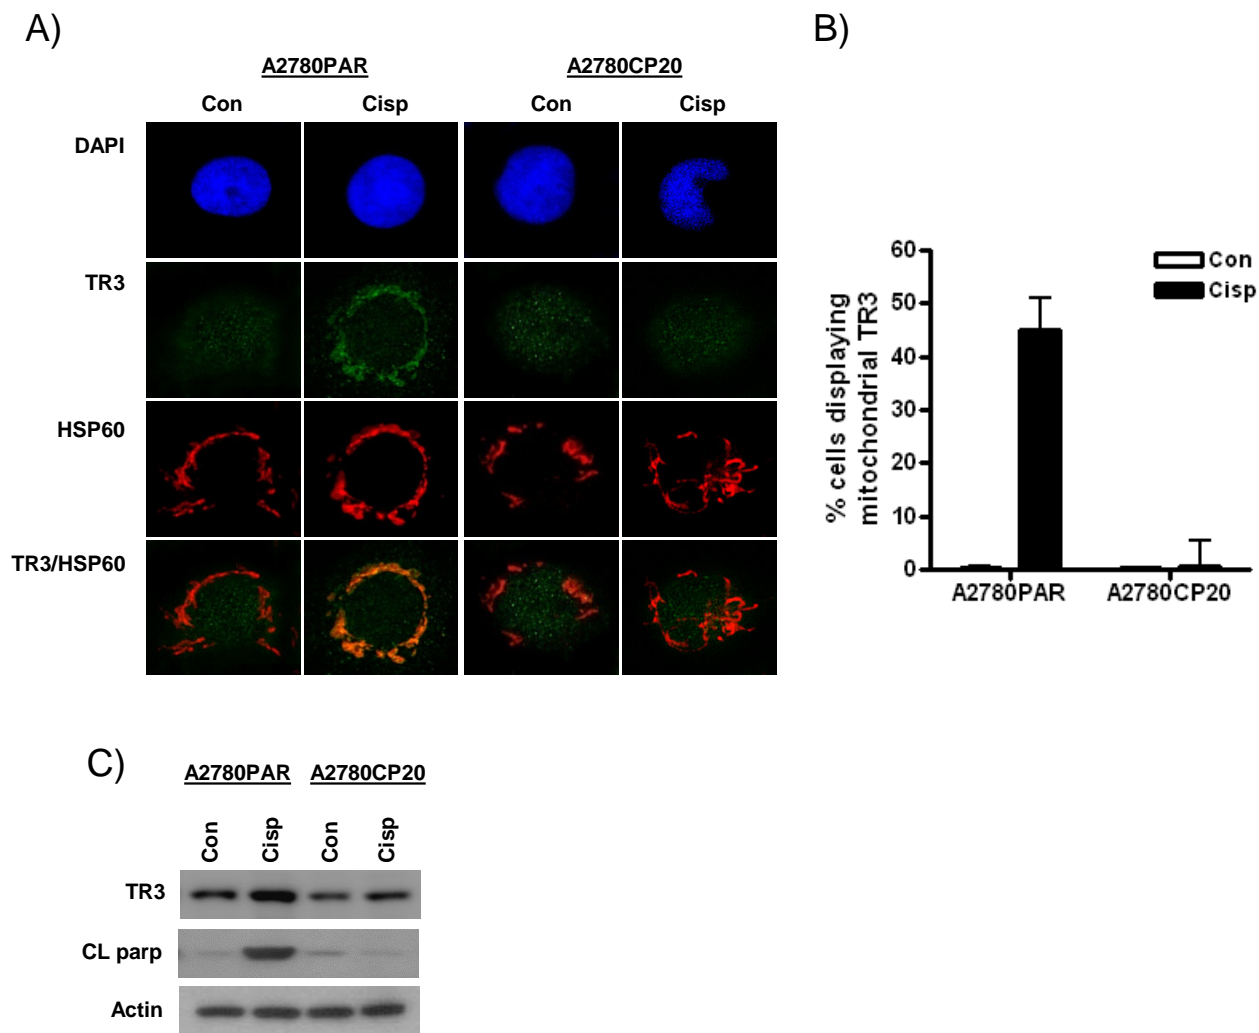

**Supplementary Figure 5. Effects of cisplatin in A2780 PAR and CP20 ovarian cancer cells. (A)** Immunofluorescence analysis of subcellular TR3 localization in cells treated with cisplatin (5  $\mu$ M) for 24h. Representative photomicrographs of cells showing cytoplasmic localization of TR3 (green) in relation to DAPI-stained nuclei (blue) and mitochondrial Hsp60 (red) in cisplatin-treated cells. **(B)** Percentage of cells displaying mitochondrial TR3 targeting in cisplatin-treated cells. **(C)** Effects of cisplatin on protein expression of TR3 and cleaved PARP.

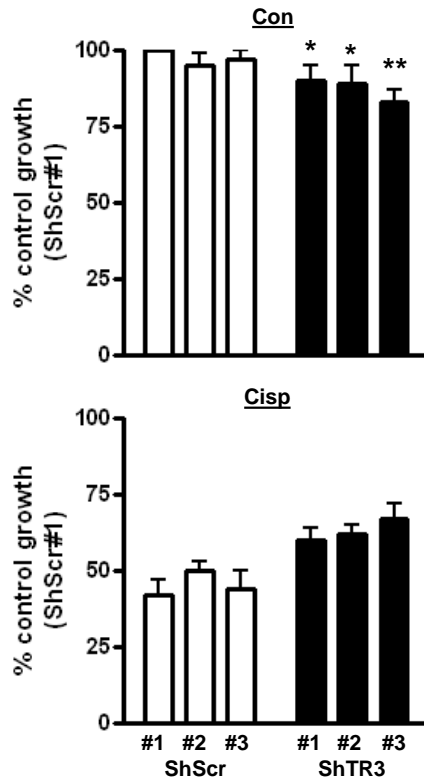

**Supplementary Figure 6.** The effect of cisplatin (5  $\mu$ M) on cell growth and cytotoxicity in SRB assays in OVCAR8 ShScr and ShTR3 cells (72h treatment). Values are the percentage of control (ShScr#1) growth (mean + SD of 3 independent experiments). \*  $p < 0.05$  relative to ShScr#1; \*\*  $p < 0.02$  relative to ShScr#1, #2 and #3, Student's t test).

A)

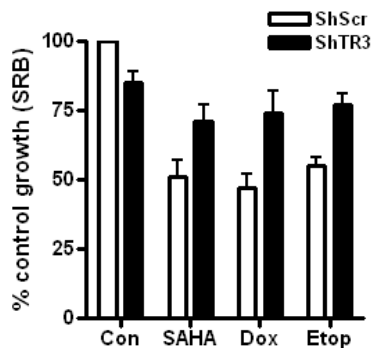

B)

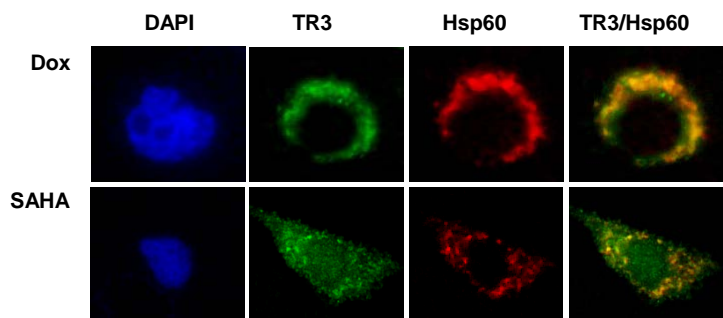

**Supplementary Figure 7. Effects of doxorubicin and the histone deacetylase inhibitor SAHA are inhibited by TR3 down-regulation. (A)** The effect of doxorubicin (0.5  $\mu$ M) and SAHA (5  $\mu$ M) on ShScr and ShTR3 cell growth and cytotoxicity in SRB assays (72h treatment). Values are the percentage of control (ShScr) growth for each drug tested. Values are mean + SD of 3 independent experiments. **(B)** Immunofluorescence analysis of subcellular TR3 localization in OVCAR8 cells treated with doxorubicin (0.5  $\mu$ M) or SAHA (5  $\mu$ M) for 24h. Representative photomicrographs of cells showing cytoplasmic localization of TR3 (green) in relation to DAPI-stained nuclei (blue) and mitochondrial Hsp60 (red) in drug treated-treated cells.

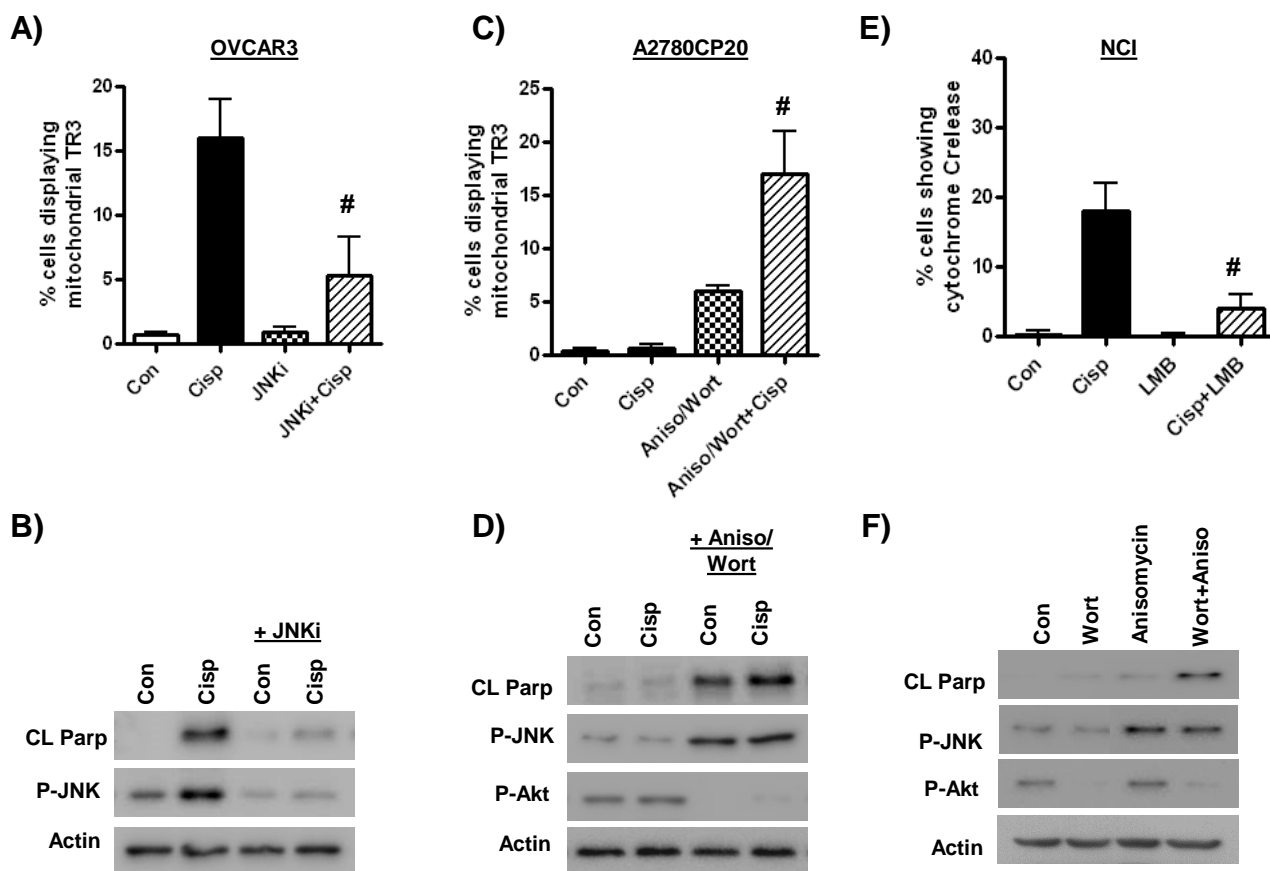

**Supplementary Figure 8.** Effects of 2h pre-treatment and then co-treatment with the JNK inhibitor SP600125 (20  $\mu$ M) on **(A)** mitochondrial localization of TR3 and **(B)** protein levels of cleaved PARP and phospho-JNK (Thr183/Tyr185) in cisplatin-treated OVCAR3 cells (5mM; 24h). Effects of 2h pre-treatment and co-treatment (3 hourly pulses) with the JNK activator anisomycin (25 ng/ml) and Akt inhibitor wortmannin (5  $\mu$ M) on **(C)** mitochondrial localization of TR3 and **(D)** protein levels of cleaved PARP, phospho-JNK (Thr183/Tyr185) and phospho-Akt (Ser473) in cisplatin-treated A2780 CP20 cells (5 $\mu$ M; 12h). The effects of 2h pre-treatment and co-treatment (3 hourly pulses) with wortmannin (5  $\mu$ M), anisomycin (25 ng/ml) or the combination in NCI/ADR-RES cells on **(E)** TR3 localization and **(F)** protein levels of cleaved PARP, phospho-JNK (Thr183/Tyr185) and phospho-Akt (Ser473) (12h treatment). Values are mean + SD of 3 independent experiments. #  $p < 0.01$  relative to cisplatin alone Student's t test.
